# Supplementary material
Source: publisher figshare collection journal article supplement (https://frontiersin.figshare.com/ndownloader/files/13848821)

Absolute blood flow

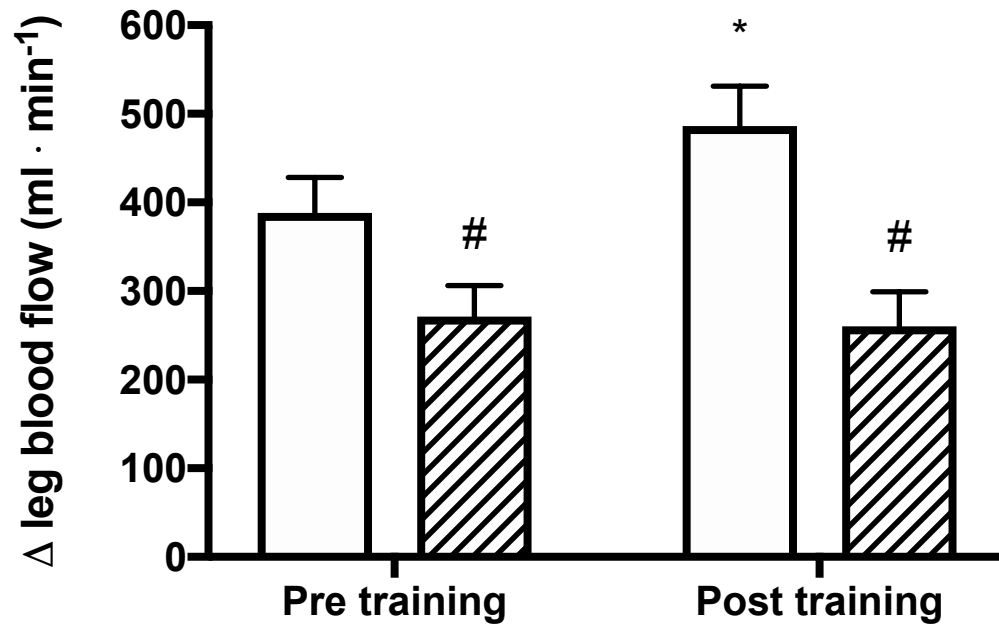

Blood flow normalized to leg mass

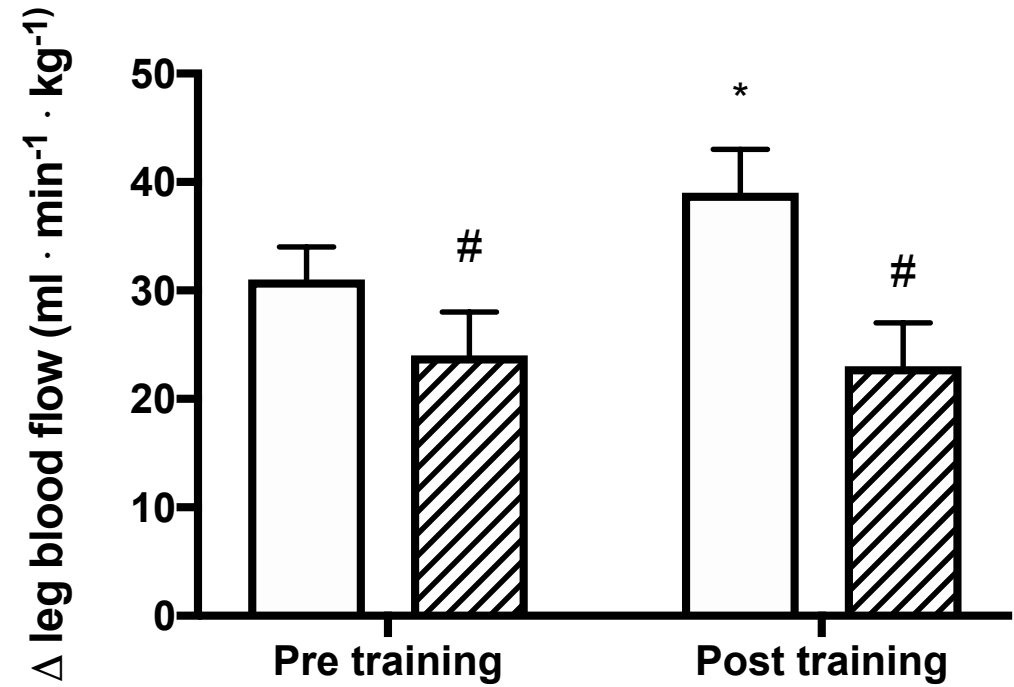

Supplement: Supplementary file [file 13848821]
